# Supplementary material
Source: HighWire-hosted journal article supplement (https://ijgc.bmj.com/highwire/filestream/16591/field_highwire_adjunct_files/0/ijgc-2020-002001supp001_data_supplement.pdf)
Supplement: ijgc-2020-002001supp001_data_supplement.pdf [file ijgc-2020-002001supp001_data_supplement.pdf]

APPENDIX

Table 1 Summary of the literature search findings according to the key themes.

| Theme         | Key findings                                                                                                                                                                                                                                                                                                                                                                                                                                                                                                                                                                                                                                     |
|---------------|--------------------------------------------------------------------------------------------------------------------------------------------------------------------------------------------------------------------------------------------------------------------------------------------------------------------------------------------------------------------------------------------------------------------------------------------------------------------------------------------------------------------------------------------------------------------------------------------------------------------------------------------------|
| Age           | <ul style="list-style-type: none"><li>• Heterogeneously recorded.</li><li>• Age thresholds varied for younger versus older patients.</li><li>• History of premenopausal hysterectomy unclear.</li><li>• Reduced sexual functioning found in younger ages alongside diminished sexual pleasure.<sup>16 19 24 34</sup></li></ul>                                                                                                                                                                                                                                                                                                                   |
| Comorbidities | <ul style="list-style-type: none"><li>• Comorbidities associated with psychosexual morbidity: increased cardiovascular risk; sedentary lifestyle; physical problems; anxiety and depression.<sup>16 23 25 28-30</sup></li><li>• Effects of treatment of such co-morbidities not investigated.</li><li>• Diabetes not included despite potential role in sexual symptoms of autonomic neuropathy.</li><li>• Pre-cancerous comorbidities not reported.</li><li>• Depression rates higher in women with epithelial ovarian cancer versus general population and correlated with sexual problems in patients and partners.<sup>25 37</sup></li></ul> |

- Younger women with epithelial ovarian cancer with relationship concerns were particularly vulnerable to anxiety (p<0.05).<sup>29</sup>
- Anxiety and fear are associated with pain during sex (dyspareunia) leading to reduced intimate touching.<sup>25</sup>
- Treatment**
  - Primary surgery precedes worsened body image, attitude toward the disease and chemotherapy-associated symptoms (p<0.05).<sup>34</sup>
  - Women after lymphadenectomy reported impaired orgasm at 12 months compared to baseline, whilst women without lymphadenectomy reported improved orgasm at 12 months (p=0.02).<sup>21</sup>
  - More chemotherapy cycles are associated with psychosexual morbidity (p<0.001).<sup>17</sup>
- Stage**
  - Unclear relationship between stage of disease and psychosexual dysfunction.
  - Several confounding factors: age (younger patients usually have earlier stage disease); menopausal symptoms; and differences in treatment.
  - Tolerance of side effects can vary depending on aim of treatment: 61% of women willing to tolerate sexual side effects if curative goal but 55% if aiming for disease stabilisation (p=0.070).<sup>33</sup>
- Reduced sexual activity**
  - Fewer women with epithelial ovarian cancer were sexually active compared to age-adjusted healthy controls (47% vs 53%, respectively).<sup>16</sup>
  - Women with ovarian cancer who were sexually active reported lower levels of sexual pleasure (p < 0.001) and higher

levels of sexual discomfort ( $p < 0.001$ ).<sup>16</sup>

- 63-75% of women reported negative changes in their sex life following diagnosis, especially after multiple recurrences.<sup>18 19</sup>
- Possible explanations include: vaginal dryness (87%); reported dyspareunia (77%); reduced sexual interest (51%); physical problems preventing sex (36%); and fatigue (18%).<sup>19</sup>
- Often reported together.
- Vaginal dryness affected 81-87% of sexually active women with epithelial ovarian cancer, with significant intensity in up to a quarter.<sup>19 20</sup>
- Dyspareunia affected up to 77% of women with ovarian cancer,<sup>19</sup> worsening from diagnosis and with longer survival.<sup>12 21 24 25</sup>
- Women after premenopausal oophorectomy had higher levels of sexual discomfort ( $p < 0.001$ ).<sup>16</sup>
- Greater sexual discomfort in sexually active women with ovarian cancer was associated with both lower serum levels of oestradiol ( $p = 0.02$ ) and higher levels of sex hormone binding globulin ( $p = 0.04$ ).<sup>16</sup>
- Lack of sexual interest increased with epithelial ovarian cancer diagnosis from 33% to 61% (54% attributed to epithelial ovarian cancer).<sup>24</sup>
- Reduced sexual interest ranged widely (31-90%).<sup>6 16 19 20</sup>

### **Vaginal**

### **dryness and dyspareunia**

### **Reduced sexual desire, interest and**

- arousal**
  - A lack of interest or desire for sex affected over a third of women with epithelial ovarian cancer (36-43%), more commonly than age-adjusted controls.<sup>16 19</sup>
  - Lack of satisfaction was described in 21% of women with epithelial ovarian cancer.<sup>19</sup>
- Reduced sexual enjoyment and ability to orgasm**
  - Orgasm is worse in long-term survivors and at one year post lymph-node resection.<sup>12 21</sup>
  - Up to two thirds of women with epithelial ovarian cancer described reduced sexual satisfaction (21-66.7%)<sup>18 19</sup> and nearly half (29-47%) felt less satisfied since treatment.<sup>41</sup>
  - Chemotherapy-induced autonomic neuropathy was not mentioned despite theoretic potential to impaired orgasm.
- Body image**
  - Difficulties with altered body image affected between a third to over half of women with epithelial ovarian cancer.<sup>22 41</sup>
  - Up to two thirds of women with epithelial ovarian cancer feel less sexually attractive since diagnosis.<sup>22 24</sup>
  - Body image changes were associated with psychosexual morbidity, sedentary behaviour, younger age, and more time since chemotherapy ended.<sup>6 16 20 28 34</sup>
- Intimate relationships**
  - Overall evidence suggested impaired relationships or reduced enjoyment of intimacy in women with epithelial ovarian cancer.<sup>22 25 36</sup>
  - Two thirds of women with epithelial ovarian cancer were dissatisfied with their sex life.<sup>18</sup>
  - Common reasons reported for sexual inactivity included: lack of interest in sex (51%); having no partner (35%); and

- Most women (75-81.5%) reported feeling close to their partners.<sup>18</sup>

| Paper          | 6 | 12 | 13 | 14 | 15 | 17 | 18 | 19 | 20 | 21 | 22 | 23 | 28 | 29 | 30 | 31 | 32 | 33 | 34 | 37 | 41 | 38 |               | 16 | 24 | 25 | 35 | 36 | 39 | 40 |
|----------------|---|----|----|----|----|----|----|----|----|----|----|----|----|----|----|----|----|----|----|----|----|----|---------------|----|----|----|----|----|----|----|
| reports on:    |   |    |    |    |    |    |    |    |    |    |    |    |    |    |    |    |    |    |    |    |    |    |               |    |    |    |    |    |    |    |
| Age            | ✓ | ✓  | ✓  | ✓  | ✓  | ✓  | ✓  | ✓  | ✓  | ✓  | ✓  | ✓  | ✓  | ✓  | ✓  | ✓  | ✓  | ✓  | ✓  |    |    |    |               | ✓  | ✓  | ✓  | ✓  | ✓  | ✓  | ✓  |
| Marital status |   |    |    |    | ✓  | ✓  |    |    |    |    |    |    |    |    |    |    | ✓  |    |    |    |    |    |               |    |    |    |    |    |    |    |
| Ethnicity      | ✓ |    |    |    |    |    |    |    |    |    |    |    |    |    |    |    |    |    |    |    |    |    |               |    |    |    |    |    |    |    |
|                |   |    |    |    |    |    |    |    |    |    |    |    |    |    |    |    |    |    |    |    |    |    | Mixed methods |    |    |    |    |    |    |    |

|                               |   |   |   |   |   |   |   |   |   |   |   |   |   |   |   |   |   |   |   |
|-------------------------------|---|---|---|---|---|---|---|---|---|---|---|---|---|---|---|---|---|---|---|
| Co-morbidities                |   |   | ✓ |   |   |   |   | ✓ |   |   |   |   |   |   |   |   |   |   |   |
| Treatments received           |   | ✓ | ✓ | ✓ |   | ✓ | ✓ | ✓ | ✓ | ✓ |   | ✓ | ✓ | ✓ |   | ✓ |   | ✓ | ✓ |
| Aim of treatment              |   | ✓ | ✓ | ✓ |   | ✓ | ✓ | ✓ |   |   |   | ✓ |   | ✓ | ✓ |   |   |   |   |
| Early/Advanced cancer         | ✓ |   |   | ✓ | ✓ |   |   |   | ✓ | ✓ | ✓ | ✓ | ✓ | ✓ | ✓ | ✓ |   | ✓ |   |
| Vaginal dryness/dyspareunia   |   | ✓ | ✓ | ✓ | ✓ | ✓ | ✓ | ✓ | ✓ |   |   |   | ✓ | ✓ |   | ✓ | ✓ | ✓ | ✓ |
| Reduced desire/arousal/orgasm | ✓ | ✓ | ✓ |   | ✓ | ✓ | ✓ |   |   |   |   |   |   |   |   | ✓ | ✓ | ✓ |   |

|                             |   |   |   |   |   |   |   |   |   |   |   |   |   |   |   |   |   |
|-----------------------------|---|---|---|---|---|---|---|---|---|---|---|---|---|---|---|---|---|
| Body image                  | ✓ |   |   |   |   | ✓ | ✓ | ✓ |   | ✓ | ✓ | ✓ |   |   | ✓ | ✓ | ✓ |
| Anxiety & Depression        | ✓ |   |   |   |   | ✓ |   |   | ✓ |   |   | ✓ |   |   | ✓ | ✓ | ✓ |
| Partner/relationship impact |   |   | ✓ | ✓ | ✓ | ✓ | ✓ |   | ✓ |   | ✓ | ✓ | ✓ |   |   | ✓ | ✓ |
| Patient preference/ QoL     | ✓ | ✓ | ✓ |   | ✓ |   | ✓ | ✓ | ✓ | ✓ | ✓ | ✓ |   | ✓ |   | ✓ | ✓ |
| FSFI                        |   | ✓ | ✓ |   |   |   | ✓ | ✓ |   |   |   | ✓ |   |   |   |   | ✓ |
| FSDS                        |   |   |   |   |   |   |   |   |   |   |   | ✓ |   |   |   | ✓ |   |
| EORTC QLQ-OV28              | ✓ | ✓ | ✓ | ✓ |   | ✓ | ✓ | ✓ | ✓ | ✓ | ✓ | ✓ |   | ✓ |   | ✓ |   |
| EORTC QLQ-C30               | ✓ | ✓ | ✓ |   |   | ✓ | ✓ | ✓ |   | ✓ | ✓ | ✓ |   |   |   | ✓ |   |

|                      |   |  |   |   |   |   |   |   |   |   |   |   |   |   |   |   |   |   |   |
|----------------------|---|--|---|---|---|---|---|---|---|---|---|---|---|---|---|---|---|---|---|
| SAQ                  |   |  | ✓ |   |   |   |   |   |   |   |   |   |   |   |   |   |   |   |   |
| Other questionnaire* | ✓ |  | ✓ | ✓ | ✓ | ✓ | ✓ | ✓ | ✓ | ✓ | ✓ | ✓ | ✓ | ✓ | ✓ | ✓ | ✓ | ✓ | ✓ |

Table 3 Results: Primary research papers investigating the sexual dysfunction of women with ovarian cancer specifically (n=29). \* EOC = epithelial ovarian cancer.

| No.                   | Study type, Tools, Demographic                                                                                                                                      | Prevalence indicators of PSM (comment on what prevalence includes)              | Risk Factors Identified                                                           | Intervention / Action                                      |
|-----------------------|---------------------------------------------------------------------------------------------------------------------------------------------------------------------|---------------------------------------------------------------------------------|-----------------------------------------------------------------------------------|------------------------------------------------------------|
| Questionnaire studies |                                                                                                                                                                     |                                                                                 |                                                                                   |                                                            |
| 17                    | One questionnaire (EORTC) QLQ-OV 28 Single institute prospective study. Aim: assess sexual health in patients treated for OC, disease free at the time of analysis. | 47% had sex in past 3 months. Lower median score for sexual function than other | Symptoms Sexual score affected by Co-morbidities (p=0.007) Vaginal dryness & pain | Strengths= Large sample, prospective, significant results. |



| No. | <u>Study type, Tools, Demographic</u>                                                                                                                                                                                                                                                               | <u>Prevalence indicators of PSM (comment on what prevalence includes)</u> | <u>Risk Factors Identified</u>                                            | <u>Intervention / Action</u>                                                                   |
|-----|-----------------------------------------------------------------------------------------------------------------------------------------------------------------------------------------------------------------------------------------------------------------------------------------------------|---------------------------------------------------------------------------|---------------------------------------------------------------------------|------------------------------------------------------------------------------------------------|
|     | n=72 age=45y (median)<br>Women with EOC disease free and married.                                                                                                                                                                                                                                   | domains.                                                                  | (p<0.04)<br>More chemo cycles<br>(p<0.001)<br>Fear of recurrence (p<0.02) | Limitations= Could only<br>access abstract. No<br>control. Single centre.<br>One questionnaire |
| 38  | Symptoms Representation Questionnaire<br>Functional Assessment of Cancer Therapy - Ovarian.<br>Aim: elicit priority rankings of 28<br>symptoms: prevalence, severity, top 3,<br>association with functional wellbeing.<br>n=497 age=?<br>Patients with recurrent<br>OC/fallopian/peritoneal cancer. | Sexual concerns 19th of 28<br>symptoms ranked in top 10.                  |                                                                           | Strengths=large sample.<br>Limitations=retrospective.                                          |

| No. | Study type, Tools, Demographic                                                                                                                                                                                                                                                                                                                                                                                                              | Prevalence indicators of<br>PSM (comment on what<br>prevalence includes)                                                                                                                                                                                                                                                                           | Risk Factors Identified                                                                                                                                                                                                                                                                        | Intervention / Action                                                                                                                                                                         |
|-----|---------------------------------------------------------------------------------------------------------------------------------------------------------------------------------------------------------------------------------------------------------------------------------------------------------------------------------------------------------------------------------------------------------------------------------------------|----------------------------------------------------------------------------------------------------------------------------------------------------------------------------------------------------------------------------------------------------------------------------------------------------------------------------------------------------|------------------------------------------------------------------------------------------------------------------------------------------------------------------------------------------------------------------------------------------------------------------------------------------------|-----------------------------------------------------------------------------------------------------------------------------------------------------------------------------------------------|
| 18  | Multiple surveys<br><br>Quality of life (FACT-O), mood (CESD),<br>social support (SPS), physical activity<br>(IPAQ-SF), diet, and clinical characteristics.<br><br>Five sites<br><br>Aim: to identify if survivors with multiple<br>recurrences would have poorer QOL, more<br>survivorship concerns, higher levels of<br>distress, poorer well-being and relationships,<br>and be less physically active than those with<br>0–1 recurrence | Sexual health changes were<br><br>prevalent (0–1: 65% vs.<br>multiple: 75%).<br><br>The majority of survivors<br>(0–1: 58.9% vs. multiple:<br>62.5%) reported being in a<br>relationship that could<br>involve sex; however only<br>about half of these women<br>(0–1: 52.2% vs. multiple:<br>50.0%) reported being<br>sexually active in the last | Symptoms<br><br>Predominant concerns being<br>decreased or absent desire,<br>dyspareunia, and reduced<br>quality of orgasms.<br><br>A majority of women (0–1:<br>81.5% vs. multiple: 75%)<br>reported feeling close to their<br>partners. These proportions<br>did not differ by group (n.s.). | Strengths=comparator<br>group (0-1 recurrence).<br><br>Limitations=not a<br>validated questionnaire re<br>sexual health, was<br>designed for this study.<br>Possibly no external<br>validity. |

| No. | Study type, Tools, Demographic                                                         | Prevalence indicators of<br>PSM (comment on what<br>prevalence includes)                                                                                                                                                         | Risk Factors Identified | Intervention / Action                              |
|-----|----------------------------------------------------------------------------------------|----------------------------------------------------------------------------------------------------------------------------------------------------------------------------------------------------------------------------------|-------------------------|----------------------------------------------------|
|     |                                                                                        | month.<br><br>n=56 (16 multiple recurrences, 40 with 0-1<br>recurrences).<br><br>Age=62.2y (mean, multiple recurrences),<br>66.9y (0-1 recurrence).<br><br>Patients with multiple recurrence vs patients<br>with 0-1 recurrence. |                         |                                                    |
| 33  | Online survey 30 questions about treatment<br>side effects developed by investigators. | 61% (n=201) of survivors<br>were willing to tolerate<br>sexual side effects for the                                                                                                                                              |                         | Strengths=large sample<br>size, prospective.       |
|     | Online – patients from different treatment<br>centres.                                 | goal of cure, 59% (n=193)<br>if aiming for remission,                                                                                                                                                                            |                         | Limitations=no mention<br>of their own limitations |

| No. | <u>Study type, Tools, Demographic</u>                                                                                                                                                                                                                              | <u>Prevalence indicators of</u><br><u>PSM (comment on what</u><br><u>prevalence includes)</u> | <u>Risk Factors Identified</u>                     | <u>Intervention / Action</u> |
|-----|--------------------------------------------------------------------------------------------------------------------------------------------------------------------------------------------------------------------------------------------------------------------|-----------------------------------------------------------------------------------------------|----------------------------------------------------|------------------------------|
|     | Aim: To determine whether survivors' acceptance of treatment side effects also changes over the disease continuum.<br><br>n=328.<br><br>Age=51-60years (mode, 43 years).<br><br>Included women with OC, on or off treatment, completed treatment and in remission. | 55% (n=179) if aiming for stable disease.                                                     |                                                    |                              |
| 29  | A validated 25-item questionnaire measuring level of concern over 5 domains: emotional                                                                                                                                                                             | Relationship concerns predict anxiety risk, esp.                                              | 55% at risk of clinically significant anxiety, 37% | Strengths=large sample size. |

| No. | <u>Study type, Tools, Demographic</u>                                                                                                                      | <u>Prevalence indicators of PSM (comment on what prevalence includes)</u> | <u>Risk Factors Identified</u>                                                                               | <u>Intervention / Action</u>                                                   |
|-----|------------------------------------------------------------------------------------------------------------------------------------------------------------|---------------------------------------------------------------------------|--------------------------------------------------------------------------------------------------------------|--------------------------------------------------------------------------------|
|     | concerns, symptom burden, body/healthy lifestyle, health care team communication (HCTC), and relationships. Patients invited from cancer support registry. | with younger ages (p<0.05).                                               | depression. Relationship, body/healthy lifestyle, symptom burden, and healthcare team communication concerns | Limitations= (Poster session). No control. Only conference abstract published. |
|     | Aim: To explore predictors of psychosocial distress among a community-based sample of women with ovarian cancer.                                           |                                                                           | were bivariately associated with anxiety and depression risk (P < 0.001).                                    |                                                                                |
|     | n=128 Age=57.3y (mean) 86% white. 4.5y (mean) since diagnosis. 34% metastatic, 45 chemo, 22% XRT, 11% hormonal.                                            |                                                                           |                                                                                                              |                                                                                |

| No. | <u>Study type, Tools, Demographic</u>                                                                                                                                                                                                                                       | <u>Prevalence indicators of PSM (comment on what prevalence includes)</u> | <u>Risk Factors Identified</u>                                                                                                                                                                                                                                                                                   | <u>Intervention / Action</u>                                                                                                                         |
|-----|-----------------------------------------------------------------------------------------------------------------------------------------------------------------------------------------------------------------------------------------------------------------------------|---------------------------------------------------------------------------|------------------------------------------------------------------------------------------------------------------------------------------------------------------------------------------------------------------------------------------------------------------------------------------------------------------|------------------------------------------------------------------------------------------------------------------------------------------------------|
| 34  | Multiple questionnaires:<br><br>EORTC QLQ-OV28,<br><br>FSFI,<br><br>Female Sexual Distress Scale (FSDS).<br><br>Single site<br><br>Aim: to evaluate the quality of life and sexual function of EOC patients during chemotherapy (CT).<br><br>n=49<br><br>Age= <=48 or >48y. | No comment                                                                | Age:<br><br>Sexual outcomes resulted in better scores in younger patients in all questionnaires<br><br>Younger women scored higher on body image, indicating they were worse affected. Scores concerning body image, attitude toward the disease and CT-associated symptoms resulted worse in patients after the | Strengths=multiple validated questionnaires used.<br><br>Limitations=conclusion states that younger women worse affected when actually score better. |

| No. | <u>Study type, Tools, Demographic</u>                                                                                      | <u>Prevalence indicators of</u><br><u>PSM (comment on what</u><br><u>prevalence includes)</u> | <u>Risk Factors Identified</u>                                                                                                                                                        | <u>Intervention / Action</u> |
|-----|----------------------------------------------------------------------------------------------------------------------------|-----------------------------------------------------------------------------------------------|---------------------------------------------------------------------------------------------------------------------------------------------------------------------------------------|------------------------------|
|     | OC type= Results stratified into: single surgery versus multiple surgeries, and first-line CT versus multiple lines of CT. |                                                                                               | first surgery (p = 0.017, p = 0.002 and p = 0.012, respectively).                                                                                                                     |                              |
|     |                                                                                                                            |                                                                                               | Symptoms:<br>Menopause-related symptoms, body image and attitude toward the disease were significantly worse during first-line CT (p = 0.018, p = 0.029 and p = 0.006, respectively). |                              |

| No. | Study type, Tools, Demographic                                                                                                                                                                                                                                                                                                                     | Prevalence indicators of<br>PSM (comment on what<br>prevalence includes)                                                                                                                                                                                                | Risk Factors Identified                                                                                                                                                                                                                                                        | Intervention / Action                                                                                                                                                                                                              |
|-----|----------------------------------------------------------------------------------------------------------------------------------------------------------------------------------------------------------------------------------------------------------------------------------------------------------------------------------------------------|-------------------------------------------------------------------------------------------------------------------------------------------------------------------------------------------------------------------------------------------------------------------------|--------------------------------------------------------------------------------------------------------------------------------------------------------------------------------------------------------------------------------------------------------------------------------|------------------------------------------------------------------------------------------------------------------------------------------------------------------------------------------------------------------------------------|
| 19  | Internet-based evaluation.<br><br>Paper and online questionnaire:<br><br>Fallowfield Sexual Activity Questionnaire (SAQ)<br><br>Charity website, online – patients from different centres. Or invited from outpatient clinic<br><br>Aim: To investigate sexual functioning in women with ovarian cancer.<br><br>n=102 (23 from clinic, 79 online). | 63% of women reported their ovarian cancer diagnosis had negatively changed their sex life.<br><br>46% sexually active, no age difference (t-test, p=0.97).<br><br>49% reported less sex since diagnosis (median 1-2 times per month).<br><br>58% ranked sex as very or | Age:<br><br>Negative impact on sexual lives reported more by younger patients (ANOVA, p=0.018).<br><br>Symptoms:<br><br>Most common reasons for absent sexual activity: lack of interest in sex (51%), physical problems that prevented sex (36%), no partner (35%), too tired | Strengths=large sample size.<br><br>Limitations=no control group.<br><br>Used data from Atkins et al. for healthy non-study cohort and EOC screening population for comparisons.<br><br>Did not collect info on sexual orientation |



| No. | <u>Study type, Tools, Demographic</u>         | <u>Prevalence indicators of PSM (comment on what prevalence includes)</u> | <u>Risk Factors Identified</u>                                                                                                                                                                                       | <u>Intervention / Action</u>           |
|-----|-----------------------------------------------|---------------------------------------------------------------------------|----------------------------------------------------------------------------------------------------------------------------------------------------------------------------------------------------------------------|----------------------------------------|
|     | Age=51.3y (mean)<br>Median 4y from diagnosis. | somewhat important to them, although 43% had little or no desire for sex. | (18%), partner not interested in sex (16%).<br><br>Of the 46% of responders who stated they were sexually active, 77% reported dyspareunia (pain or discomfort during intercourse)<br>87% described vaginal dryness. |                                        |
| 28  | Multiple questionnaires<br>EORTC QLQ-C30,     | PSM prevalence not reported.                                              | Sedentary behaviour was associated with poorer                                                                                                                                                                       | Strengths= two centre study, validated |

| No. | <u>Study type, Tools, Demographic</u>                                                                                                             | <u>Prevalence indicators of PSM (comment on what prevalence includes)</u> | <u>Risk Factors Identified</u>                                                                                       | <u>Intervention / Action</u>                                                                                                      |
|-----|---------------------------------------------------------------------------------------------------------------------------------------------------|---------------------------------------------------------------------------|----------------------------------------------------------------------------------------------------------------------|-----------------------------------------------------------------------------------------------------------------------------------|
|     | QLQ-OV28                                                                                                                                          | 35% of women overweight,                                                  | quality of life scores                                                                                               | questionnaires, BMI at                                                                                                            |
|     | The Godin Leisure Time Exercise questionnaire                                                                                                     | 18% obese, only 21% met recommendations for PA.                           | including sexual functioning (p=0.001) and body image (p=0.018). Obesity associated with poorer body image (p=0.023) | time of surgery not dx, 71.3% response rate. Women dx at stage I/II perhaps representing the surviving population.                |
|     | Two centre cross-sectional study.                                                                                                                 |                                                                           |                                                                                                                      |                                                                                                                                   |
|     | Aim: To evaluate the association between body mass index (BMI), physical activity (PA) and the quality of life (QoL) of ovarian cancer survivors. |                                                                           |                                                                                                                      | Limitations= Non-responders had higher BMIs. Most women stage III/IV at dx. Self-reported measures of height, weight, PA -risking |
|     | n=204                                                                                                                                             |                                                                           |                                                                                                                      |                                                                                                                                   |
|     | age=63y at diagnosis                                                                                                                              |                                                                           |                                                                                                                      |                                                                                                                                   |

| No. | Study type, Tools, Demographic                                                     | Prevalence indicators of<br>PSM (comment on what<br>prevalence includes)                                             | Risk Factors Identified                                                                                         | Intervention / Action                                                                                               |
|-----|------------------------------------------------------------------------------------|----------------------------------------------------------------------------------------------------------------------|-----------------------------------------------------------------------------------------------------------------|---------------------------------------------------------------------------------------------------------------------|
|     |                                                                                    |                                                                                                                      |                                                                                                                 | inaccuracy/reporting bias.                                                                                          |
|     | 49% stage I/II disease at diagnosis. 97% had surgery, 84% had chemo.               |                                                                                                                      |                                                                                                                 |                                                                                                                     |
| 12  | Questionnaire, FSFI                                                                | LTS showed lower rates Desire (1.2 vs. 3.3), Arousal (1.0 vs. 4.2), Lubrication (0.5 vs. 5.4). Orgasm (0.0 vs. 5.0). | Pain more commonly reported by LTS (0.0 vs. 5.2) Shows lasting effect of EOC on sexuality (8y+ post diagnosis). | Strengths=healthy women control group<br><br>Limitations=insufficient data for p values?<br>Insufficiently powered? |
|     | Aim: To evaluate the impact of sexuality in longterm survivors with ovarian cancer | Overall sexuality score for n=20 LTS (long term survivors), 28 healthy controls.                                     |                                                                                                                 |                                                                                                                     |
|     | Age=LTS 68y median, control 49y median.                                            | LTS was 5.2 compared to 28.2 for healthy women.                                                                      |                                                                                                                 |                                                                                                                     |

| No. | <u>Study type, Tools, Demographic</u>                                                                                                                                        | <u>Prevalence indicators of</u><br><u>PSM (comment on what</u><br><u>prevalence includes)</u>                                                                                  | <u>Risk Factors Identified</u>                                                                                                                                                                                              | <u>Intervention / Action</u>                                                                                                                                   |
|-----|------------------------------------------------------------------------------------------------------------------------------------------------------------------------------|--------------------------------------------------------------------------------------------------------------------------------------------------------------------------------|-----------------------------------------------------------------------------------------------------------------------------------------------------------------------------------------------------------------------------|----------------------------------------------------------------------------------------------------------------------------------------------------------------|
|     | Healthy vs EOC long-term survivors (>=8y since diagnosis)                                                                                                                    |                                                                                                                                                                                |                                                                                                                                                                                                                             |                                                                                                                                                                |
| 30  | Multiple Questionnaires:<br>EORTC QLQ-C30<br>EORTC QLQ OV28<br>Investigator questionnaire<br><br>Single centre<br><br>Aim: Pilot study re quality of life in ovarian cancer. | Global quality of life did not vary by clinico-pathologic parameters.<br><br>Cardiovascular comorbidities were associated with the EORTC scores of sexual health (P =. 0.025). | Demographics:<br><br>Clinical factors such as age, stage, and histology did not have a significant impact on QoL.<br><br>Symptoms:<br><br>Psychosocial factors have a larger impact on global quality of life than physical | Strengths=sample size calculation number met.<br><br>Limitations= small number. Mixed methods of collecting data before/after clinic,<br><br>No Control group. |

| No. | Study type, Tools, Demographic                                                                                                                                                               | Prevalence indicators of<br>PSM (comment on what<br>prevalence includes)                           | Risk Factors Identified                                                                                                                    | Intervention / Action                                                                                                                                 |
|-----|----------------------------------------------------------------------------------------------------------------------------------------------------------------------------------------------|----------------------------------------------------------------------------------------------------|--------------------------------------------------------------------------------------------------------------------------------------------|-------------------------------------------------------------------------------------------------------------------------------------------------------|
|     | n=102<br><br>All women with OC, 80% EOC of which<br><br>66% HGSOC. 47% stage III, 46% under<br>surveillance.<br><br>Age=58 mean                                                              |                                                                                                    | symptoms.                                                                                                                                  |                                                                                                                                                       |
| 31  | Multiple questionnaires<br><br>EORTC QLQ-C30<br><br>EORTC QLQ- OV28<br><br><br>Single site<br><br><br>Aim: evaluate longitudinally the quality of<br>life (QOL) in women treated for ovarian | Prevalence of PSM was not<br>documented, rather a<br>downward trend of<br>symptoms from treatment. | Symptoms:<br><br>Decrease of symptoms<br>concerning body image and<br>sexual worries observed<br>between and 3 and 6 months<br>(p=0.0052). | Strengths=validated<br>questionnaire.<br><br>Limitations=no control<br>group, patients not<br>surveyed on<br>chemotherapy type, only<br>stage IC-III. |

| No. | Study type, Tools, Demographic                                                                                                                                                                                    | Prevalence indicators of<br>PSM (comment on what<br>prevalence includes)                                                                                                | Risk Factors Identified | Intervention / Action                                                                                                                     |
|-----|-------------------------------------------------------------------------------------------------------------------------------------------------------------------------------------------------------------------|-------------------------------------------------------------------------------------------------------------------------------------------------------------------------|-------------------------|-------------------------------------------------------------------------------------------------------------------------------------------|
|     | cancer, pre-operatively, three and six months<br>postoperatively.<br><br>n=93<br>FIGO IC-III<br>Age=56 mean (28-89)                                                                                               |                                                                                                                                                                         |                         |                                                                                                                                           |
| 32  | Single questionnaire:<br><br>Supportive Care Needs Survey-Short Form<br><br>measured 34 needs across five domains (3 of<br>which comprised sexuality).<br><br>Aim:<br><br>To determine changes in supportive care | Unmet sexuality needs<br><br>decreased over 2 years from<br>baseline (6-12/12 post dx)<br><br>versus up to 2y post dx (p <<br>0.05).<br><br>On average, sexuality needs |                         | Strengths=country-wide<br>assessment, validated<br>tool.<br><br>Limitations=baseline<br>survey completed over<br>wide interval (6-12/12). |

| No. | <u>Study type, Tools, Demographic</u>                                                                                                                                       | <u>Prevalence indicators of PSM (comment on what prevalence includes)</u>                                                                                 | <u>Risk Factors Identified</u>                                                                       | <u>Intervention / Action</u>                                    |
|-----|-----------------------------------------------------------------------------------------------------------------------------------------------------------------------------|-----------------------------------------------------------------------------------------------------------------------------------------------------------|------------------------------------------------------------------------------------------------------|-----------------------------------------------------------------|
|     | needs after first-line treatment for ovarian cancer and identify risk factors for future unmet needs.<br><br>n=219<br><br>Age=59 median.<br><br>76% married/in partnership. | were either non-existent or completely met by 12 and 24 months after baseline, respectively (p < 0.001 and p = 0.011 for change over time, respectively). |                                                                                                      | Limited sample for multi-variable modelling.                    |
| 6   | Multiple questionnaires<br><br>EORTC QLQ-C30<br><br>EORTC QLQ-OV28<br><br>Sexual problems due to cancer (CALGB).                                                            | Decreased sexual interest and activity attributed to cancer affected 31–54% of survivors.                                                                 | Demographics:<br><br>Early staged ov ca<br><br>demonstrated a correlation between sexual dysfunction | Strengths=advanced vs early stage.<br><br>Limitations=no normal |

| <u>No.</u> | <u>Study type, Tools, Demographic</u>                                                                                                                                                                                                                                                  | <u>Prevalence indicators of<br/>PSM (comment on what<br/>prevalence includes)</u>                                       | <u>Risk Factors Identified</u>                                                                                                                                                               | <u>Intervention / Action</u>                                                                                                                                         |
|------------|----------------------------------------------------------------------------------------------------------------------------------------------------------------------------------------------------------------------------------------------------------------------------------------|-------------------------------------------------------------------------------------------------------------------------|----------------------------------------------------------------------------------------------------------------------------------------------------------------------------------------------|----------------------------------------------------------------------------------------------------------------------------------------------------------------------|
|            | MHI-17 (anxiety, depression and global well-being)<br>FACT Fatigue<br>Beck's Hopelessness Scale, Fear of Recurrence,<br>PCL-C post-traumatic stress disorder (PTSD),<br>Unmet Needs<br>FACT-Spirituality, Complementary therapy Use.<br>MOS Social Support Survey.<br><br>Single site. | Decreased sexual interest attributed to cancer and anxiety when getting CA-125 testing were of concern for both groups. | and global QoL ?due to younger age or different expectations<br><br>Symptoms:<br>Sexual problems were significantly correlated to worse body image (early P < 0.0001, advanced P<0.01).<br>. | control group, higher proportion of those with early disease refused participation – selection bias. Age difference between groups. Mostly white, educated, married. |



| No. | <u>Study type, Tools, Demographic</u>                                                                                                                                                                                                                                                               | <u>Prevalence indicators of</u><br><u>PSM (comment on what</u><br><u>prevalence includes)</u> | <u>Risk Factors Identified</u>         | <u>Intervention / Action</u>                      |
|-----|-----------------------------------------------------------------------------------------------------------------------------------------------------------------------------------------------------------------------------------------------------------------------------------------------------|-----------------------------------------------------------------------------------------------|----------------------------------------|---------------------------------------------------|
|     | <p>Aim: to compare the long-term adjustment and quality of life of early and advanced stage ovarian cancer survivors.</p> <p>n=58 early and 42 advanced</p> <p>Predominantly ovarian (also fallopian and primary peritoneal.)</p> <p>Age (mean)= 48.3y early (SD 8.8), 55.1y advanced (SD 11.3)</p> |                                                                                               |                                        |                                                   |
| 41  | Four-part Questionnaire compiled by investigators.                                                                                                                                                                                                                                                  | >69% in each group<br><br>satisfied with sex life pre-                                        | Symptoms<br><br>Large proportion found | Strengths=considers many<br><br>aspects of sexual |

| <u>No.</u> | <u>Study type, Tools, Demographic</u>                                                                                              | <u>Prevalence indicators of PSM (comment on what prevalence includes)</u> | <u>Risk Factors Identified</u>                                                                                                                                                                                                    | <u>Intervention / Action</u>                                                       |
|------------|------------------------------------------------------------------------------------------------------------------------------------|---------------------------------------------------------------------------|-----------------------------------------------------------------------------------------------------------------------------------------------------------------------------------------------------------------------------------|------------------------------------------------------------------------------------|
|            | Multiple sites                                                                                                                     | treatment. 29-47% felt sex life worsened after treatment (more advanced   | partners had same (33-45%) or better (26-37%) attitude towards them.                                                                                                                                                              | functioning. Large sample size.                                                    |
|            | Aim: to compare treatment modalities' effects on ovarian ca: surgery, surgery + chemo, chemo. Completed 2-6 months post treatment. | being most affected, p<0.05).                                             | Over half experienced a change in body image (not statistically significant P > 0.05). Women with advanced disease or treated with combination or chemotherapy were worse affected than women with early stage disease or surgery | Limitations=No control group. Not a validated questionnaire. Assumes partner male. |
|            | n=483                                                                                                                              |                                                                           |                                                                                                                                                                                                                                   |                                                                                    |
|            | N=156 = early stage, surgery only.                                                                                                 |                                                                           |                                                                                                                                                                                                                                   |                                                                                    |
|            | N=238, advanced, surgery +chemo.                                                                                                   |                                                                           |                                                                                                                                                                                                                                   |                                                                                    |
|            | N=89 advanced inoperable/metastatic,                                                                                               |                                                                           |                                                                                                                                                                                                                                   |                                                                                    |

| No. | <u>Study type, Tools, Demographic</u> | <u>Prevalence indicators of PSM (comment on what prevalence includes)</u> | <u>Risk Factors Identified</u>                                                                                                     | <u>Intervention / Action</u> |
|-----|---------------------------------------|---------------------------------------------------------------------------|------------------------------------------------------------------------------------------------------------------------------------|------------------------------|
|     | chemo alone.                          |                                                                           | alone.                                                                                                                             |                              |
|     | Age=?                                 |                                                                           | <10% thought they would be unable to have intercourse after treatment.                                                             |                              |
|     |                                       |                                                                           | Problems in sexual functioning appear to be related to the consequence of artificial menopause symptoms and the extent of disease. |                              |
| 20  | Multiple questionnaires.              | The majority of women                                                     | Symptoms:                                                                                                                          | Strengths=all patients had   |

| <u>No.</u> | <u>Study type, Tools, Demographic</u>                                                                                                                                           | <u>Prevalence indicators of PSM (comment on what prevalence includes)</u>                                                       | <u>Risk Factors Identified</u>                                                                                                                   | <u>Intervention / Action</u>                                                                                                               |
|------------|---------------------------------------------------------------------------------------------------------------------------------------------------------------------------------|---------------------------------------------------------------------------------------------------------------------------------|--------------------------------------------------------------------------------------------------------------------------------------------------|--------------------------------------------------------------------------------------------------------------------------------------------|
|            | EORTC QLQ-C30,<br>EORTC QLQ-OV28<br>Wellbeing thermometer.<br><br>Single site.                                                                                                  | surveyed experienced persistent psychological and physical symptoms following ovarian cancer treatment incl: sexual inactivity. | Vaginal dryness was reported by 81% of participants but was of significant intensity in 25%.<br><br>Greater time since end of chemotherapy was a | had surgery and some platinum-based chemotherapy. No-one with actively progressing/recurring disease.                                      |
|            | Aim: to evaluate physical and psychological symptoms of patients following completion of treatment for ovarian cancer, compared to symptoms documented in their hospital notes. | 90% reported none or “a little” interest in sex within the preceding 4 weeks, 22% had been sexually active to some extent.      | predictive factor for deterioration in body image perception (odds ratio: 1.001, p: 0.04).                                                       | Limitations=includes patients treated with primary or recurrent disease – heterogenous sample. Recall bias. Age categorised as < or > 62y. |

| No. | Study type, Tools, Demographic                                                                                                                                                                                                                                         | Prevalence indicators of PSM (comment on what prevalence includes) | Risk Factors Identified                                                                                                                                                                                                   | Intervention / Action                                                                                       |
|-----|------------------------------------------------------------------------------------------------------------------------------------------------------------------------------------------------------------------------------------------------------------------------|--------------------------------------------------------------------|---------------------------------------------------------------------------------------------------------------------------------------------------------------------------------------------------------------------------|-------------------------------------------------------------------------------------------------------------|
|     | n=100                                                                                                                                                                                                                                                                  |                                                                    |                                                                                                                                                                                                                           | No age-matched control.                                                                                     |
|     | Age= 62.8y mean (categorised <62y, >62y).                                                                                                                                                                                                                              |                                                                    |                                                                                                                                                                                                                           |                                                                                                             |
| 21  | Multiple Questionnaires:<br><br>Sexual Activity Questionnaire (SAQ)<br><br>FSFI.<br><br>EORTC QLQ-C30<br><br><br>Multiple sites<br><br><br>Aim: to investigate the effect of<br>lymphadenectomy (pelvic and para-aortic)<br><br>with subsequent chemotherapy on sexual | Prevalence of PSM not reported.                                    | 55 sexually active, 182 inactive, 17 NA.<br><br><br>Symptoms:<br><br>Discomfort evaluated as dryness of the vagina and dyspareunia was significantly worse at 12 months compared to baseline (p < 0.001) but the surgical | Strengths=prospective.<br><br><br>Limitations=51% response rate, 72% sexually inactive, no healthy control. |

| No. | <u>Study type, Tools, Demographic</u>                                                                           | <u>Prevalence indicators of PSM (comment on what prevalence includes)</u>        | <u>Risk Factors Identified</u>                                                                                                                                  | <u>Intervention / Action</u>                                |
|-----|-----------------------------------------------------------------------------------------------------------------|----------------------------------------------------------------------------------|-----------------------------------------------------------------------------------------------------------------------------------------------------------------|-------------------------------------------------------------|
|     | activity. Pre-surgery then at 6, 12, 24 months.                                                                 |                                                                                  | variable LNE did not show any impact on this.                                                                                                                   |                                                             |
|     | n=254.                                                                                                          |                                                                                  | Orgasm subscale showed diverging results with a deterioration from baseline to 12 months in the LNE group, but slightly improving in the no-LNE group (p=0.02). |                                                             |
|     | Age=60.5y (21.4-75.8).                                                                                          |                                                                                  |                                                                                                                                                                 |                                                             |
| 22  | Pts and partners questionnaires<br>EORTC-QLQC30,<br>EORTC-QLQ-OV-28,<br>Female Sexual Function Index (FSFI) and | 65% couples sexually active.<br>27% EOC survivors and 9% partners found physical | Symptoms:<br>31% EOC survivors felt body negatively changed by OC.                                                                                              | Strengths=involves partners also.<br>Limitations=no control |

| No. | <u>Study type, Tools, Demographic</u>                                                                                                                                                                                                                                                                 | <u>Prevalence indicators of PSM (comment on what prevalence includes)</u> | <u>Risk Factors Identified</u>                                                                                                                                            | <u>Intervention / Action</u>                                |
|-----|-------------------------------------------------------------------------------------------------------------------------------------------------------------------------------------------------------------------------------------------------------------------------------------------------------|---------------------------------------------------------------------------|---------------------------------------------------------------------------------------------------------------------------------------------------------------------------|-------------------------------------------------------------|
|     | self-developed questions.<br><br>Single site<br><br>Aim: to investigate the effects of EOC and its treatment on the survivor's body image and her feelings of attractiveness as reported by EOC survivors and their partners.<br><br>n=130 couples.<br>Age 39y (Relationship duration median, 5-60y). | contact less enjoyable.                                                   | 62% survivors felt less attractive.<br><br>Partners rarely felt like this (6% and 3% respectively).<br><br>Global FSFI 19 (6.8-30) and on body image subscale 21 (0-100). | group, work supported by industry. Only abstract available. |
| 23  | Single Questionnaire                                                                                                                                                                                                                                                                                  | Prevalence of PSM not                                                     | Symptoms:                                                                                                                                                                 | Strengths=validated                                         |

| No. | <u>Study type, Tools, Demographic</u>                                                                                                                                                                                                           | <u>Prevalence indicators of PSM (comment on what prevalence includes)</u> | <u>Risk Factors Identified</u>                                                                                                                 | <u>Intervention / Action</u>                                                       |
|-----|-------------------------------------------------------------------------------------------------------------------------------------------------------------------------------------------------------------------------------------------------|---------------------------------------------------------------------------|------------------------------------------------------------------------------------------------------------------------------------------------|------------------------------------------------------------------------------------|
|     | EORTC QLQ-OV28.<br><br>Single site.<br><br>Aim: to compare quality of life outcomes for women post-surgery and chemo in early vs advanced OC.<br><br>n=47 EOC, last chemo >6/12 ago. n=26 advanced and 21 early.<br><br>Age=56.5, 58.3 (18-70). | reported.                                                                 | No significant difference between early and advanced groups in sexual function (p=0.789), menopausal symptoms (p=0.763), body image (p=0.342). | questionnaire.<br><br>Limitations=only includes sexually active women, no control. |
| 37  | Multiple Questionnaires Patient and partner                                                                                                                                                                                                     | Prevalence of PSM not                                                     | Symptoms:                                                                                                                                      | Strengths=involves                                                                 |



| No. | <u>Study type, Tools, Demographic</u>                                                                                                                                           | <u>Prevalence indicators of PSM (comment on what prevalence includes)</u> | <u>Risk Factors Identified</u>                                                                                                               | <u>Intervention / Action</u>                                                                                            |
|-----|---------------------------------------------------------------------------------------------------------------------------------------------------------------------------------|---------------------------------------------------------------------------|----------------------------------------------------------------------------------------------------------------------------------------------|-------------------------------------------------------------------------------------------------------------------------|
|     | HR-QoL, HADS Sexual Function.                                                                                                                                                   | reported.                                                                 | For women with ovarian cancer, depression seems to correlate with sexual function and sexual function in partners is mediated by depression. | partners and multiple questionnaires. Limitations= only abstract available. Ambiguous results presentation in abstract. |
|     | Aim: To give an insight to the extent of impact that ovarian cancer, treatment and/or side effects may have had on the sexual function of both partners and longterm survivors. |                                                                           |                                                                                                                                              |                                                                                                                         |
|     | N=? (not published)                                                                                                                                                             |                                                                           |                                                                                                                                              |                                                                                                                         |
|     | Mean 6y post diagnosis.                                                                                                                                                         |                                                                           |                                                                                                                                              |                                                                                                                         |
|     | Correlation and regression analyses.                                                                                                                                            |                                                                           |                                                                                                                                              |                                                                                                                         |

| No. | Study type, Tools, Demographic                                                                                                                                                                                                                                                                                                                                         | Prevalence indicators of PSM (comment on what prevalence includes)                                                                                                                                                       | Risk Factors Identified                                                                                                                       | Intervention / Action                                                                                                                                                                             |
|-----|------------------------------------------------------------------------------------------------------------------------------------------------------------------------------------------------------------------------------------------------------------------------------------------------------------------------------------------------------------------------|--------------------------------------------------------------------------------------------------------------------------------------------------------------------------------------------------------------------------|-----------------------------------------------------------------------------------------------------------------------------------------------|---------------------------------------------------------------------------------------------------------------------------------------------------------------------------------------------------|
| 13  | <p>Cross-sectional, case-control.</p> <p>Questionnaires</p> <p>EORTC QLQ-30,</p> <p>EORTC QLQ-OV28,</p> <p>FSFI.</p> <p>Aim: To compare quality of life (QoL) and sexual functioning between sexually active ovarian cancer survivors and healthy women.</p> <p>n=146: 73=OC, 73=Healthy</p> <p>Age=mean 50.7-52.0.</p> <p>Predominantly FIGO stage I and III. 78%</p> | <p>Sexuality, both in terms of desire, arousal, lubrication, orgasm, satisfaction, and pain and in terms of interest in sex, sexual activity, and enjoyment of sex (EORTC QLQ-OV28) were similar between the groups.</p> | <p>Symptoms:</p> <p>Vaginal dryness was more problematic in ovarian cancer survivors, with borderline statistical significance (p=0.081).</p> | <p>Strengths= ov ca vs healthy control.</p> <p>Limitations=only incl. women sexually active in past 3/12. Selection bias from study design, reporting bias from self-reported questionnaires.</p> |

| No. | <u>Study type, Tools, Demographic</u>                                                                                                                                                                                                                            | <u>Prevalence indicators of PSM (comment on what prevalence includes)</u>                           | <u>Risk Factors Identified</u> | <u>Intervention / Action</u>                                                                                                                                         |
|-----|------------------------------------------------------------------------------------------------------------------------------------------------------------------------------------------------------------------------------------------------------------------|-----------------------------------------------------------------------------------------------------|--------------------------------|----------------------------------------------------------------------------------------------------------------------------------------------------------------------|
|     | had surgery and chemotherapy.                                                                                                                                                                                                                                    |                                                                                                     |                                |                                                                                                                                                                      |
| 14  | Semi-structured qualitative interviews comparing adult women having had chemotherapy for ovarian cancer and adult caregivers for women with ovarian cancer.<br><br>n=55 patient (23 care-givers)<br><br>Age=53 patient, 54 care-givers.<br><br>Mean 4y since dx. | Prevalence of PSM not documented.                                                                   | Patients reported dyspareunia. | Strengths=control group<br><br>Limitations=only abstract (oral). 44% carers husbands, 22% daughters – not always sexual relationship and assumes caregivers healthy? |
| 15  | Multiple Questionnaires:<br><br>HR-QoL and sex function: EORTC-QLQC30, OV-28.<br><br>Norm data for age-matched controls from                                                                                                                                     | OC survivors:<br><br>median sexual function 83 (17-100), 36% undisturbed sex function. Partners: 43 | -                              | Strengths=compares to normal control. Linearly transformed questionnaire scores, differences and                                                                     |

| No. | <u>Study type, Tools, Demographic</u>                                                                                                                                                           | <u>Prevalence indicators of</u><br><u>PSM (comment on what</u><br><u>prevalence includes)</u>                                   | <u>Risk Factors Identified</u> | <u>Intervention / Action</u>                                                                                           |
|-----|-------------------------------------------------------------------------------------------------------------------------------------------------------------------------------------------------|---------------------------------------------------------------------------------------------------------------------------------|--------------------------------|------------------------------------------------------------------------------------------------------------------------|
|     | PROFILES registry.                                                                                                                                                                              | and 1.5%, respectively.<br><br>15% partners scored 0.                                                                           |                                | correlations calculated.                                                                                               |
|     | Aim: to compare sexual function after<br>ovarian cancer for survivors and partners<br>with normdata in age-matched controls.<br>n=275 EOC survivors, n=137 partners.<br>Mean 6y post diagnosis. | Normdata:<br><br>score of 17 and 50 for<br>female and male age-<br>matched controls,<br>respectively.                           |                                | Limitations=confusing<br>results when compared<br>with age-matched<br>controls. Only conference<br>abstract published. |
|     | Age=?                                                                                                                                                                                           | Sexual function between<br>survivors and partners<br>correlated strongly<br>(Spearman's rho .617,<br>p<0.01). Did not correlate |                                |                                                                                                                        |

| No.           | Study type, Tools, Demographic                                                                                                                                                                                         | Prevalence indicators of PSM (comment on what prevalence includes)                                                                                                             | Risk Factors Identified                                                                                                                                  | Intervention / Action                                                                                                              |
|---------------|------------------------------------------------------------------------------------------------------------------------------------------------------------------------------------------------------------------------|--------------------------------------------------------------------------------------------------------------------------------------------------------------------------------|----------------------------------------------------------------------------------------------------------------------------------------------------------|------------------------------------------------------------------------------------------------------------------------------------|
|               |                                                                                                                                                                                                                        | strongly with age matched controls, effect seems limited.                                                                                                                      |                                                                                                                                                          |                                                                                                                                    |
| Mixed methods |                                                                                                                                                                                                                        |                                                                                                                                                                                |                                                                                                                                                          |                                                                                                                                    |
| 24            | Questionnaires & Interviews EORTC QLQ-OV28<br>CALGB (Cancer and Leukemia Group B) Sexual Functioning Scale)<br><br>Multiple sites.<br><br>Aim: to describe the quality of life, consequences of treatment, and factors | <10% of survivors reported either an interest in sex or were sexually active.<br><br>61% states sex was not at all or a little enjoyable,<br><br>10% reported sexual interest, | Demographics:<br><br>Age was negatively correlated with sexual problems (more sexual problems in younger women) and with comorbidities.<br><br>Symptoms: | Strengths=validated measurement tools.<br><br>Limitations=high proportion of unanswered questions – up to 1/3.<br><br>Recall bias. |

| No. | <u>Study type, Tools, Demographic</u>                             | <u>Prevalence indicators of PSM (comment on what prevalence includes)</u> | <u>Risk Factors Identified</u>                                      | <u>Intervention / Action</u> |
|-----|-------------------------------------------------------------------|---------------------------------------------------------------------------|---------------------------------------------------------------------|------------------------------|
|     | correlating with psychologic state in early-stage ovarian cancer. | 9% sexually active.                                                       | Menopausal symptoms and negative impact on sexuality were reported. |                              |
|     | n=58                                                              | 33% decreased sexual interest 1yr pre-dx then                             | Increased dyspareunia and feeling sexually unattractive since dx.   |                              |
|     | Age (mean)= 48.3 at dx, 56.2 at interview.                        | 61% as survivor, 54% due to cancer.                                       |                                                                     |                              |
|     | 97% White.                                                        |                                                                           |                                                                     |                              |
|     | Predominantly IA or IC.                                           |                                                                           |                                                                     |                              |
| 25  | Questionnaires and focus group                                    | Women with OC: poorer                                                     | Symptoms                                                            | Strengths=validated          |
|     | EORTC-QLQ-C30                                                     | QoL, sexual distress, lower                                               | Themes from focus groups:                                           | measurement tools; in-       |
|     | DAS                                                               | relationship satisfaction and                                             | Pain and loss of desire                                             | depth focus group;           |
|     | SFQ                                                               | increased depression rates                                                | Changes to Orgasm                                                   | multisite.                   |
|     | FSDS                                                              | vs published general                                                      | Body image                                                          |                              |

| No. | <u>Study type, Tools, Demographic</u>                                                                                                                                                                                                    | <u>Prevalence indicators of</u><br><u>PSM (comment on what</u><br><u>prevalence includes)</u> | <u>Risk Factors Identified</u> | <u>Intervention / Action</u>         |
|-----|------------------------------------------------------------------------------------------------------------------------------------------------------------------------------------------------------------------------------------------|-----------------------------------------------------------------------------------------------|--------------------------------|--------------------------------------|
|     | BDI<br><br>SF-36<br><br><br>Multiple sites<br><br><br>Aim: To evaluate how women with ovarian cancer (OC) experience and express sexuality, in the context of their illness.<br><br><br>n=64 completed questionnaires<br>n=3 Focus group | population values.                                                                            |                                | Limitations=no control.              |
| 39  | Interviews and multiple questionnaires<br><br>FSFI to measure sexual dysfunction.                                                                                                                                                        | Sexual dysfunction was the<br><br>second most commonly                                        | No comment.                    | Strengths: Large sample<br><br>size. |

| No. | <u>Study type, Tools, Demographic</u>                                                                                                                                      | <u>Prevalence indicators of</u><br><u>PSM (comment on what</u><br><u>prevalence includes)</u>                                                                        | <u>Risk Factors Identified</u> | <u>Intervention / Action</u>                                 |
|-----|----------------------------------------------------------------------------------------------------------------------------------------------------------------------------|----------------------------------------------------------------------------------------------------------------------------------------------------------------------|--------------------------------|--------------------------------------------------------------|
|     | Principal component analysis with a varimax.<br><br>Single site                                                                                                            | reported symptom (99%)<br><br>following chemotherapy-induced peripheral neuropathy.                                                                                  |                                | Limitations sexual function not included in symptom cluster. |
|     | Aim: to investigate the symptom clusters and effects of symptom clusters on the quality of life of patients with Ovarian cancer.<br><br>n=210<br><br>Age: Median 55 years. | Symptoms arranged into 2 clusters but sexual dysfunction not included in either cluster because its Spearman rank correlation coefficient value was lower than 0.30. |                                |                                                              |



| <u>No.</u> | <u>Study type, Tools, Demographic</u>                                                                                                                                                                                                                    | <u>Prevalence indicators of PSM (comment on what prevalence includes)</u>                                                                                                                                                          | <u>Risk Factors Identified</u>                                                                                                                                                                                                                                                            | <u>Intervention / Action</u>                                                                                                                                                                                |
|------------|----------------------------------------------------------------------------------------------------------------------------------------------------------------------------------------------------------------------------------------------------------|------------------------------------------------------------------------------------------------------------------------------------------------------------------------------------------------------------------------------------|-------------------------------------------------------------------------------------------------------------------------------------------------------------------------------------------------------------------------------------------------------------------------------------------|-------------------------------------------------------------------------------------------------------------------------------------------------------------------------------------------------------------|
| 36         | Qualitative descriptive methods.<br><br>Individual interviews and focus group.<br><br>Single site.<br><br>Aim: To understand treatment induced changes in sexuality from the patient perspective.<br><br>n=8, (individual interviews)<br><br>Age: 33-69y | Regardless of age or relationship status, sexuality is altered by the diagnosis (62%) and treatment of ovarian cancer.<br><br>Women defined sexuality broadly from their physical appearance to how they relate to their partners. | Symptoms:<br><br>Mechanical changes caused by surgery coupled with hormonal changes added to the intensity and dimension of the symptom experience.<br><br>Physiologic (incl. post-surgical hormonal changes and scarring, chemotherapy-induced cognitive changes, peripheral neuropathy, | Strengths: wide range of ages and point in treatment included.<br><br>Limitations: no control group, Possible selection bias for who goes into interviews vs focus group, heterogenous sample, recall bias. |

| No. | <u>Study type, Tools, Demographic</u>                                                                                            | <u>Prevalence indicators of PSM (comment on what prevalence includes)</u>    | <u>Risk Factors Identified</u>                                                                                                                                                                                  | <u>Intervention / Action</u>                                       |
|-----|----------------------------------------------------------------------------------------------------------------------------------|------------------------------------------------------------------------------|-----------------------------------------------------------------------------------------------------------------------------------------------------------------------------------------------------------------|--------------------------------------------------------------------|
|     | 1 <sup>st</sup> line treatment, 6-24 months from diagnosis.<br><br>n=5 (focus group)<br><br>Age: 40-75y, 6/12-8y from diagnosis. |                                                                              | weight change, menopausal symptoms), psychological (loss of fertility, perceptions of scars, ports, alopecia), and social factors (incl. partner relationships) also impacted how this symptom was experienced. |                                                                    |
| 35  | Principal component analyses, structured interviews of older (>=65y) and younger (21-65y) women.                                 | PCA components for values incl: length of life and sexual function: 3 items, | Demographics:<br><br>While worry during EOC treatment decision-making                                                                                                                                           | Strengths= High number of respondents. Structured phone interviews |

| No. | <u>Study type, Tools, Demographic</u>                                                                                              | <u>Prevalence indicators of PSM (comment on what prevalence includes)</u> | <u>Risk Factors Identified</u>               | <u>Intervention / Action</u>                         |
|-----|------------------------------------------------------------------------------------------------------------------------------------|---------------------------------------------------------------------------|----------------------------------------------|------------------------------------------------------|
|     |                                                                                                                                    | proportion of variance explained 20.1%.                                   | may differ across age groups, values do not. | consistent approach.                                 |
|     | Multiple sites                                                                                                                     |                                                                           |                                              | Limitations= No response                             |
|     | Aim: To understand the differences in value and worries of older and younger women with ovarian cancer, diagnosed in past 2 years. |                                                                           |                                              | rate discussed. Unclear results presentation.        |
|     | n=170                                                                                                                              |                                                                           |                                              | Potential interview bias.                            |
|     | Age=42.3% 65y+                                                                                                                     |                                                                           |                                              | Measured using own questionnaire but not correlated. |

| No. | <u>Study type, Tools, Demographic</u>                                                                                                                                                                                                                                                                                                 | <u>Prevalence indicators of PSM (comment on what prevalence includes)</u>                                                                                                       | <u>Risk Factors Identified</u>                                                                                                                                                                                                                                                                                          | <u>Intervention / Action</u>                                                                                                                                                                                |
|-----|---------------------------------------------------------------------------------------------------------------------------------------------------------------------------------------------------------------------------------------------------------------------------------------------------------------------------------------|---------------------------------------------------------------------------------------------------------------------------------------------------------------------------------|-------------------------------------------------------------------------------------------------------------------------------------------------------------------------------------------------------------------------------------------------------------------------------------------------------------------------|-------------------------------------------------------------------------------------------------------------------------------------------------------------------------------------------------------------|
| 16  | Mixed Methods:<br><br>Questionnaire and sex hormone blood tests<br><br>Single site.<br><br>Aim: To explore sexual activity and functioning in epithelial ovarian cancer survivors (EOCSs) compared to age-adjusted controls from the general population (NORM).<br><br>n=189 (66%) OC, 98 NORM<br><br>age=51y at dx, 56,58y at survey | 47% EOCs sexually active vs 53% NORM. The sexually active EOCSs reported lower levels sexual pleasure (p < 0.001) and higher levels of sexual discomfort than NORM (p < 0.001). | Symptoms:<br><br>In sexually active EOCSs an association between higher level of sexual discomfort and both lower serum levels of estradiol (p = 0.02) and higher levels of SHBG (p = 0.04) was observed.<br><br>Lack of interest (36%) and physical problems (23%) were significantly more common in sexually inactive | Strengths=Compared to age-adjusted controls, powered. 2 controls per EOC patient randomly selected form 988.<br><br>Limitations=low participation rate of NORM sample, EOC pts incl. pts treated from 1979. |

| No. | Study type, Tools, Demographic             | Prevalence indicators of<br>PSM (comment on what<br>prevalence includes) | Risk Factors Identified                                                                                                                                                                                                            | Intervention / Action |
|-----|--------------------------------------------|--------------------------------------------------------------------------|------------------------------------------------------------------------------------------------------------------------------------------------------------------------------------------------------------------------------------|-----------------------|
|     |                                            |                                                                          | EOCSs compared to NORM.                                                                                                                                                                                                            |                       |
|     |                                            |                                                                          | In multivariable analyses of<br>sexually active EOCSs<br>premenopausal<br>oophorectomy, having had<br>chemotherapy, age at survey,<br>mental health and body<br>image were significantly<br>associated with sexual<br>functioning. |                       |
| 40  | Retrospective review of patients Data from | Clinicians never reported                                                |                                                                                                                                                                                                                                    | Strengths=aims to     |

| No. | <u>Study type, Tools, Demographic</u>      | <u>Prevalence indicators of</u><br><u>PSM (comment on what</u><br><u>prevalence includes)</u> | <u>Risk Factors Identified</u> | <u>Intervention / Action</u> |
|-----|--------------------------------------------|-----------------------------------------------------------------------------------------------|--------------------------------|------------------------------|
|     | an RCT.                                    | sexuality concerns or hot                                                                     |                                | improve patient-clinician    |
|     | Questionnaire: Symptom Representation      | flashes (both priority                                                                        |                                | communication.               |
|     | Questionnaire for 28 symptoms and selected | symptoms for 6%). Over                                                                        |                                |                              |
|     | 3 priority symptoms (PS)                   | half (52%) reported                                                                           |                                | Limitations=retrospective,   |
|     |                                            | abdominal/pelvic                                                                              |                                | no control reported,         |
|     | Single site                                | pain/bloating.                                                                                |                                | ?selection bias – one site   |
|     |                                            |                                                                                               |                                | completed this               |
|     | Aim: Compared patient-reported PS to       | Discordance between                                                                           |                                | questionnaire in RCT.        |
|     | clinician documentation of symptoms and    | symptoms reported by                                                                          |                                |                              |
|     | interventions over the time period         | patients and those                                                                            |                                |                              |
|     | corresponding to study WRITE Symptoms      | documented. If not                                                                            |                                |                              |
|     | Study (GOG 259), a randomized controlled   | documented, less likely to                                                                    |                                |                              |
|     | trial of internet-based recurrent ovarian  | receive intervention.                                                                         |                                |                              |

| <u>No.</u> | <u>Study type, Tools, Demographic</u> | <u>Prevalence indicators of</u> | <u>Risk Factors Identified</u> | <u>Intervention / Action</u> |
|------------|---------------------------------------|---------------------------------|--------------------------------|------------------------------|
|            |                                       | <u>PSM (comment on what</u>     |                                |                              |
|            |                                       | <u>prevalence includes)</u>     |                                |                              |

cancer symptom management.

n=50

Age=58y (28-77).

All with recurrent/persistent disease.
